# Supplementary material for: How to Stage Airflow Limitation in Stable Chronic Obstructive Pulmonary Disease Male Patients?
Source: PubMed Central journal article supplement — Am J Mens Health. 2020 May 30;14(3):1557988320922630. doi: 10.1177/1557988320922630 (PMC7263160; doi:10.1177/1557988320922630), 2020-05-30
Supplement: Appendix_CLEAN.pdf [file Appendix_CLEAN.pdf]

## APPENDIX

**Table 1S. Main results of some studies that compared the impacts of different COPD airflow limitation (AFL) staging classifications in predicting survival, mortality and other clinical outcomes.**

| Reference                                                   | Miller, Pedersen, & Dirksen (2007)                                                                                                           | Miller and Pedersen (2010)                                                                                                                                                                    | Pedone et al. (2013)                                                                                                       | Turkeshi et al. (2015)                                                                                           | Hegendorfer et al. (2017)                                                                                                                                              | Huang et al. (2018)                                                                                                                                                                                                                                                 |
|-------------------------------------------------------------|----------------------------------------------------------------------------------------------------------------------------------------------|-----------------------------------------------------------------------------------------------------------------------------------------------------------------------------------------------|----------------------------------------------------------------------------------------------------------------------------|------------------------------------------------------------------------------------------------------------------|------------------------------------------------------------------------------------------------------------------------------------------------------------------------|---------------------------------------------------------------------------------------------------------------------------------------------------------------------------------------------------------------------------------------------------------------------|
| <b>Yr of publication</b>                                    | .2007                                                                                                                                        | .2010                                                                                                                                                                                         | .2012                                                                                                                      | .2015                                                                                                            | .2016                                                                                                                                                                  | .2018                                                                                                                                                                                                                                                               |
| <b>Aims</b>                                                 | .To test whether raw FEV <sub>1</sub> or FEV <sub>1</sub> /Height <sup>2</sup> was better than FEV <sub>1%pred</sub> for predicting survival | .To explore the relationship between different expressions of FEV <sub>1</sub> and all-cause mortality                                                                                        | .To compare the prognostic implications of 3 different expressions of FEV <sub>1</sub> in an unselected elderly population | .To investigate the short term prognostic value of FEV <sub>1</sub> /Height <sup>3</sup> for all-cause mortality | .To assess and compare the predictive value of 5 expressions of FEV <sub>1</sub> for all-cause mortality, unplanned hospitalization, decline in physical/mental status | .To evaluate the staging COPD performance of 7 expressions of FEV <sub>1</sub> in predicting the risks of some clinical outcomes                                                                                                                                    |
| <b>Study design</b>                                         | .Retrospective<br>.Longitudinal follow-up                                                                                                    | .Retrospective<br>.Longitudinal follow-up                                                                                                                                                     | .Retrospective<br>.Longitudinal follow-up                                                                                  | .Retrospective observational<br>.Longitudinal follow-up: 3 Yrs/until death                                       | . Retrospective observational<br>.Longitudinal follow-up: 3 Yrs/until death                                                                                            | Retrospective<br>.Longitudinal follow-up (≥1 Yr/until death)                                                                                                                                                                                                        |
| <b>N° of COPD (M/F)</b>                                     | .1095 (451/644)                                                                                                                              | .1095 (451/644)                                                                                                                                                                               | .318 (250/68)                                                                                                              | .54 (???)                                                                                                        | .54 (???)                                                                                                                                                              | .296 (279/17)                                                                                                                                                                                                                                                       |
| <b>Control-groups</b>                                       | .NA                                                                                                                                          | .25872                                                                                                                                                                                        | .475 non-COPD [Post-BD FEV <sub>1</sub> /FVC > LLN] (207/268)                                                              | .447                                                                                                             | .447                                                                                                                                                                   | .NA                                                                                                                                                                                                                                                                 |
| <b>Age (Yrs)</b>                                            | .61.8±9.9 <sup>a</sup>                                                                                                                       | .> 20<br>.COPD: 61.8±9.9 <sup>a</sup>                                                                                                                                                         | .COPD: > 65<br>.COPD: 72.9±5.52 <sup>a</sup><br>.non-COPD: 73.2±6.29 <sup>a</sup>                                          | .≥ 80<br>.84.8±3.7 <sup>a</sup>                                                                                  | .≥ 80<br>.84.8±3.7 <sup>a</sup>                                                                                                                                        | .40-95 <sup>b</sup><br>.71±14 <sup>a</sup>                                                                                                                                                                                                                          |
| <b>BD test practice</b>                                     | .300 µg of salbutamol and 0.06 mg of ipratropium bromide<br>.2 weeks of ICS                                                                  | .COPD group: 300 µg of salbutamol and 0.06 mg of ipratropium bromide<br>.COPD group: 2 weeks of ICS                                                                                           | .Yes (fenoterol)                                                                                                           | No                                                                                                               | .No                                                                                                                                                                    | .Yes (if available, n=240)                                                                                                                                                                                                                                          |
| <b>COPD definition</b>                                      | .Pre-BD FEV <sub>1</sub> /FVC < 89% <sub>pred</sub>                                                                                          | .Pre-BD FEV <sub>1</sub> /FVC < 89% <sub>pred</sub>                                                                                                                                           | .Post-BD FEV <sub>1</sub> /FVC < LLN                                                                                       | .NR                                                                                                              | .NR                                                                                                                                                                    | .FEV <sub>1</sub> /FVC < LLN                                                                                                                                                                                                                                        |
| <b>Used FEV<sub>1</sub></b>                                 | .NR                                                                                                                                          | .NR                                                                                                                                                                                           | .Post-BD                                                                                                                   | .Pre-BD                                                                                                          | .Pre-BD                                                                                                                                                                | .Post-BD, if available                                                                                                                                                                                                                                              |
| <b>FEV<sub>1</sub> expressions [applied cut off points]</b> | .FEV <sub>1</sub> raw<br>.FEV <sub>1%pred</sub><br>.FEV <sub>1z-score</sub><br>.FEV <sub>1</sub> /Height <sup>2</sup>                        | .FEV <sub>1</sub> raw<br>.FEV <sub>1%pred</sub><br>.FEV <sub>1z-score</sub><br>.FEV <sub>1</sub> /Height <sup>2</sup><br>.FEV <sub>1</sub> /Height <sup>3</sup><br>.FEV <sub>1</sub> Quotient | .FEV <sub>1%pred</sub><br>.FEV <sub>1</sub> /Height <sup>3</sup><br>.FEV <sub>1</sub> Quotient                             | .FEV <sub>1</sub> /Height <sup>3</sup>                                                                           | .FEV <sub>1%pred</sub><br>.FEV <sub>1</sub> /Height <sup>2</sup><br>.FEV <sub>1</sub> /Height <sup>3</sup><br>.FEV <sub>1</sub> Quotient                               | .FEV <sub>1%pred</sub><br>.FEV <sub>1%pred</sub> [quartiles]<br>.FEV <sub>1z-score</sub> [quartiles]<br>.FEV <sub>1</sub> /Height <sup>2</sup> [quartiles; cut off]<br>.FEV <sub>1</sub> /Height <sup>3</sup> [quartiles]<br>.FEV <sub>1</sub> Quotient [quartiles] |

| Table 1S. Continued.    |                                                                                                                                                                                                                                                                                                                                                                                                                                                                                                                                                                                                                                                                                                                                             |                                                                                                                                                                                                                                                                                                                                                                                                                                                                                                                                                                                                                                                                                                                                                                                                     |                                                                                                                                                                                                                                                                                                                                                                     |                                                                                                                                                                                                                                                                                       |                                                                                                                                                                                                                                                                                                                                                                                                                                                                                                                                                                                                                             |                                                                                                                                                                                                                                                                                                                                                                                                                                                                                         |
|-------------------------|---------------------------------------------------------------------------------------------------------------------------------------------------------------------------------------------------------------------------------------------------------------------------------------------------------------------------------------------------------------------------------------------------------------------------------------------------------------------------------------------------------------------------------------------------------------------------------------------------------------------------------------------------------------------------------------------------------------------------------------------|-----------------------------------------------------------------------------------------------------------------------------------------------------------------------------------------------------------------------------------------------------------------------------------------------------------------------------------------------------------------------------------------------------------------------------------------------------------------------------------------------------------------------------------------------------------------------------------------------------------------------------------------------------------------------------------------------------------------------------------------------------------------------------------------------------|---------------------------------------------------------------------------------------------------------------------------------------------------------------------------------------------------------------------------------------------------------------------------------------------------------------------------------------------------------------------|---------------------------------------------------------------------------------------------------------------------------------------------------------------------------------------------------------------------------------------------------------------------------------------|-----------------------------------------------------------------------------------------------------------------------------------------------------------------------------------------------------------------------------------------------------------------------------------------------------------------------------------------------------------------------------------------------------------------------------------------------------------------------------------------------------------------------------------------------------------------------------------------------------------------------------|-----------------------------------------------------------------------------------------------------------------------------------------------------------------------------------------------------------------------------------------------------------------------------------------------------------------------------------------------------------------------------------------------------------------------------------------------------------------------------------------|
| Reference               | Miller, Pedersen, & Dirksen (2007)                                                                                                                                                                                                                                                                                                                                                                                                                                                                                                                                                                                                                                                                                                          | Miller and Pedersen (2010)                                                                                                                                                                                                                                                                                                                                                                                                                                                                                                                                                                                                                                                                                                                                                                          | Pedone et al. (2013)                                                                                                                                                                                                                                                                                                                                                | Turkeshi et al. (2015)                                                                                                                                                                                                                                                                | Hegendorfer et al. (2017)                                                                                                                                                                                                                                                                                                                                                                                                                                                                                                                                                                                                   | Huang et al. (2018)                                                                                                                                                                                                                                                                                                                                                                                                                                                                     |
| <b>Number of stages</b> | .5 (FEV <sub>1%</sub> pred - GOLD 2005 (NIHNHLBI, 2005))<br>.4 (FEV <sub>1</sub> /Height <sup>2</sup> : 0.5; 0.4; 0.3)                                                                                                                                                                                                                                                                                                                                                                                                                                                                                                                                                                                                                      | .10 (1 to 10 deciles)                                                                                                                                                                                                                                                                                                                                                                                                                                                                                                                                                                                                                                                                                                                                                                               | .5 (worst, 2 <sup>nd</sup> , 3 <sup>rd</sup> , 4 <sup>th</sup> , best quintiles)                                                                                                                                                                                                                                                                                    | .2 (≤ the lowest quartile and the rest)                                                                                                                                                                                                                                               | .4 (1 <sup>st</sup> , 2 <sup>nd</sup> , 3 <sup>rd</sup> and 4 <sup>th</sup> quartiles)                                                                                                                                                                                                                                                                                                                                                                                                                                                                                                                                      | .4 (1;2;3;4)                                                                                                                                                                                                                                                                                                                                                                                                                                                                            |
| <b>Outcomes</b>         | .AFL severity<br>.Survival                                                                                                                                                                                                                                                                                                                                                                                                                                                                                                                                                                                                                                                                                                                  | .All-cause mortality                                                                                                                                                                                                                                                                                                                                                                                                                                                                                                                                                                                                                                                                                                                                                                                | .Prognostic implications (NR)<br>.Mortality risk at 5, 10 and 15 Yrs                                                                                                                                                                                                                                                                                                | .All-cause mortality at 3 Yrs<br>.Unplanned hospitalization<br>.Decline in physical status<br>.Decline in mental status                                                                                                                                                               | .All-cause mortality at 5 Yrs<br>.Unplanned hospitalization<br>.Decline in physical status<br>.Decline in mental status                                                                                                                                                                                                                                                                                                                                                                                                                                                                                                     | .SAE<br>.All-cause mortality                                                                                                                                                                                                                                                                                                                                                                                                                                                            |
| <b>Mains results</b>    | <b>COPD AFL severity</b><br>.FEV <sub>1%</sub> pred [GOLD]<br>Light*: 40.05% <sup>c</sup><br>Severe*: 59.94% <sup>c</sup><br>.FEV <sub>1</sub> /Height <sup>2</sup> :<br>Light*: 54.14% <sup>c</sup><br>Severe*:45.86% <sup>c</sup><br><b>COPD survival</b><br>.FEV <sub>1%</sub> pred: not as good as either raw FEV <sub>1</sub> or FEV <sub>1</sub> /Height <sup>2</sup> at predicting survival.<br>.FEV <sub>1</sub> /Height <sup>2</sup> : stratify COPD subjects into survival groups better than GOLD criteria without recourse to other data such as arterial gases.<br>.FEV <sub>1</sub> /Height <sup>2</sup> : better than both raw FEV <sub>1</sub> and FEV <sub>1%</sub> pred for expressing degree of lung function impairment | <b>AUC for predicting survival</b><br>.FEV <sub>1</sub> Quotient: 0.631 [0.624-0.637] <sup>d</sup> (p: NR)<br>.FEV <sub>1</sub> /Height <sup>3</sup> :0.626 [0.619-0.633] <sup>d</sup><br>.FEV <sub>1</sub> /Height <sup>2</sup> :0.621 [0.614-0.628] <sup>d</sup><br>.raw FEV <sub>1</sub> :0.606 [0.599-0.612] <sup>d</sup><br>.FEV <sub>1%</sub> pred: 0.586 [0.579-0.592] <sup>d</sup><br>.FEV <sub>1z</sub> -score: 0.571 <sup>e</sup><br><b>Cox regression analysis</b><br>.The best model for predicting survival was with FEV <sub>1</sub> Quotient followed by FEV <sub>1</sub> /Height <sup>3</sup> and FEV <sub>1</sub> /Height <sup>2</sup> then FEV <sub>1%</sub> pred (p<0.05)<br><b>Data from a single sex</b><br>.FEV <sub>1</sub> Quotient: no advantage over raw FEV <sub>1</sub> | <b>COPD group</b><br>.FEV <sub>1%</sub> pred compared to FEV <sub>1</sub> /Height <sup>3</sup> and FEV <sub>1</sub> Quotient: weaker association with mortality.<br>. FEV <sub>1</sub> Quotient: stronger association with mortality.<br>. FEV <sub>1</sub> Quotient: better performance compared to FEV <sub>1</sub> /Height <sup>3</sup> in predicting mortality. | .FEV <sub>1</sub> /Height <sup>3</sup> : associated with all-cause mortality and hospitalizations as well as decline in physical and mental functioning<br>.FEV <sub>1</sub> /Height <sup>3</sup> : takes into account body size variability and does not require reference equation. | <b>Predicting all cause mortality and hospitalization</b><br>.FEV <sub>1</sub> /Height <sup>3</sup> : highest relative IDI<br><b>Physical and mental decline</b><br>.Only FEV <sub>1</sub> /Height <sup>3</sup> was independently associated with physical decline (adjusted OR= 1.93)<br>.FEV <sub>1</sub> Quotient: highest adjusted OR (2.80) and highest relative IDI (0.348) for mental decline<br>.FEV <sub>1</sub> Quotient: best performance in predicting mental decline compared with FEV <sub>1%</sub> pred, followed closely by FEV <sub>1</sub> /Height <sup>3</sup> and FEV <sub>1</sub> /Height <sup>2</sup> | <b>SAE</b><br>.Staging based on FEV <sub>1</sub> Quotient and FEV <sub>1</sub> /Height <sup>2</sup> [quartiles]: discriminated the risk of SAE<br>.Staging based on FEV <sub>1%</sub> pred [GOLD] and FEV <sub>1z</sub> -score [quartiles]: stratified unsatisfactorily the risks of SAE<br><b>All-cause mortality</b><br>.FEV <sub>1%</sub> pred [quartiles], FEV <sub>1</sub> Quotient [quartiles] and FEV <sub>1</sub> /Height <sup>2</sup> [cut off]: stratified the mortality risk |
|                         |                                                                                                                                                                                                                                                                                                                                                                                                                                                                                                                                                                                                                                                                                                                                             |                                                                                                                                                                                                                                                                                                                                                                                                                                                                                                                                                                                                                                                                                                                                                                                                     |                                                                                                                                                                                                                                                                                                                                                                     |                                                                                                                                                                                                                                                                                       |                                                                                                                                                                                                                                                                                                                                                                                                                                                                                                                                                                                                                             |                                                                                                                                                                                                                                                                                                                                                                                                                                                                                         |
|                         |                                                                                                                                                                                                                                                                                                                                                                                                                                                                                                                                                                                                                                                                                                                                             |                                                                                                                                                                                                                                                                                                                                                                                                                                                                                                                                                                                                                                                                                                                                                                                                     |                                                                                                                                                                                                                                                                                                                                                                     |                                                                                                                                                                                                                                                                                       |                                                                                                                                                                                                                                                                                                                                                                                                                                                                                                                                                                                                                             |                                                                                                                                                                                                                                                                                                                                                                                                                                                                                         |
|                         |                                                                                                                                                                                                                                                                                                                                                                                                                                                                                                                                                                                                                                                                                                                                             |                                                                                                                                                                                                                                                                                                                                                                                                                                                                                                                                                                                                                                                                                                                                                                                                     |                                                                                                                                                                                                                                                                                                                                                                     |                                                                                                                                                                                                                                                                                       |                                                                                                                                                                                                                                                                                                                                                                                                                                                                                                                                                                                                                             |                                                                                                                                                                                                                                                                                                                                                                                                                                                                                         |
|                         |                                                                                                                                                                                                                                                                                                                                                                                                                                                                                                                                                                                                                                                                                                                                             |                                                                                                                                                                                                                                                                                                                                                                                                                                                                                                                                                                                                                                                                                                                                                                                                     |                                                                                                                                                                                                                                                                                                                                                                     |                                                                                                                                                                                                                                                                                       |                                                                                                                                                                                                                                                                                                                                                                                                                                                                                                                                                                                                                             |                                                                                                                                                                                                                                                                                                                                                                                                                                                                                         |
|                         |                                                                                                                                                                                                                                                                                                                                                                                                                                                                                                                                                                                                                                                                                                                                             |                                                                                                                                                                                                                                                                                                                                                                                                                                                                                                                                                                                                                                                                                                                                                                                                     |                                                                                                                                                                                                                                                                                                                                                                     |                                                                                                                                                                                                                                                                                       |                                                                                                                                                                                                                                                                                                                                                                                                                                                                                                                                                                                                                             |                                                                                                                                                                                                                                                                                                                                                                                                                                                                                         |

| <b>Reference</b>                                                                                                                                                                                                                                                                                                                                                                                                                                                                                                                                                                                                                                                                                                                                                                                                                                                                                                                                                                                                                                                                                                                                                                                                                                                                                                                     | <b>Miller, Pedersen, &amp; Dirksen (2007)</b>                                                                                                                                                                                                   | <b>Miller and Pedersen (2010)</b>                                                                                                                                                                         | <b>Pedone et al. (2013)</b>                                                                                                                                                                                                       | <b>Turkeshi et al. (2015)</b>                                                                                                                                                                                                                           | <b>Hegendorfer et al. (2017)</b>                                                                                                                                | <b>Huang et al. (2018)</b>                                                                                                                                                                                                                                                               |
|--------------------------------------------------------------------------------------------------------------------------------------------------------------------------------------------------------------------------------------------------------------------------------------------------------------------------------------------------------------------------------------------------------------------------------------------------------------------------------------------------------------------------------------------------------------------------------------------------------------------------------------------------------------------------------------------------------------------------------------------------------------------------------------------------------------------------------------------------------------------------------------------------------------------------------------------------------------------------------------------------------------------------------------------------------------------------------------------------------------------------------------------------------------------------------------------------------------------------------------------------------------------------------------------------------------------------------------|-------------------------------------------------------------------------------------------------------------------------------------------------------------------------------------------------------------------------------------------------|-----------------------------------------------------------------------------------------------------------------------------------------------------------------------------------------------------------|-----------------------------------------------------------------------------------------------------------------------------------------------------------------------------------------------------------------------------------|---------------------------------------------------------------------------------------------------------------------------------------------------------------------------------------------------------------------------------------------------------|-----------------------------------------------------------------------------------------------------------------------------------------------------------------|------------------------------------------------------------------------------------------------------------------------------------------------------------------------------------------------------------------------------------------------------------------------------------------|
| <b>Conclusions</b>                                                                                                                                                                                                                                                                                                                                                                                                                                                                                                                                                                                                                                                                                                                                                                                                                                                                                                                                                                                                                                                                                                                                                                                                                                                                                                                   | .FEV <sub>1</sub> /Height <sup>2</sup> : better related to survival in COPD than FEV <sub>1</sub> % <sub>pred</sub> <sup>d</sup> .<br>.FEV <sub>1</sub> /Height <sup>2</sup> : best method for expressing degree of FEV <sub>1</sub> impairment | .FEV <sub>1</sub> % <sub>pred</sub> : not ideal for expressing lung function impairment<br>.FEV <sub>1</sub> Quotient: best method, with FEV <sub>1</sub> /Height <sup>3</sup> being the next alternative | .FEV <sub>1</sub> Quotient and FEV <sub>1</sub> /Height <sup>3</sup> : appealing way of standardizing the FEV <sub>1</sub><br>.FEV <sub>1</sub> % <sub>pred</sub> : not the best prognostic indicator in elderly people with COPD | .Low FEV <sub>1</sub> /Height <sup>3</sup> : associated with all-cause mortality and higher risk of hospitalizations as well as decline in physical and mental functioning<br>.FEV <sub>1</sub> /Height <sup>3</sup> : more suitable for use in elderly | .FEV <sub>1</sub> /Height <sup>3</sup> and FEV <sub>1</sub> Quotient: better at predicting all-cause mortality, hospitalization and physical and mental decline | .Staging severity based on FEV <sub>1</sub> % <sub>pred</sub> [GOLD]: predicted inadequately the risks of adverse outcomes<br>.Staging severity based on FEV <sub>1</sub> Quotient [quartiles]: predicted the risks of SAE and mortality and well stratified the differences in survival |
| <p><b>AUC</b>: area under the curve. <b>BD</b>: bronchodilator. <b>COPD</b>: chronic obstructive pulmonary disease. <b>F</b>: female. <b>FEV<sub>1</sub></b>: forced expiratory volume in one second. <b>Quotient</b>: lowest sex-specific first percentile (0.5 L for males). <b>FVC</b>: forced vital capacity. <b>GOLD</b>: global initiative for chronic obstructive lung disease. <b>ICS</b>: inhaled corticosteroids. <b>IDI</b>: integrative discrimination index. <b>LLN</b>: lower limit of normal. <b>M</b>: male. <b>N°</b>: number. <b>NA</b>: non-applied. <b>NR</b>: not-reported. <b>OR</b>: odds-ratio. <b>p</b>: probability. <b>SAE</b>: severe acute exacerbation. <b>SD</b>: standard deviation. <b>Yr</b>: year. %<sub>pred</sub>: % of the predicted value.</p> <p>Data were:</p> <p><sup>a</sup>Mean±SD<br/> <sup>b</sup>Minimum-maximum<br/> <sup>c</sup>Percentage<br/> <sup>d</sup>Mean (Confidence interval)<br/> <sup>e</sup>Mean</p> <p>Notes: <b>**"light"</b> : FEV<sub>1</sub>%<sub>pred</sub> at stage 0, 1 and 2 of GOLD 2005 (<b>NIHNHLBI, 2005</b>) or FEV<sub>1</sub>/Height<sup>2</sup> &gt; 0.4 L/m<sup>2</sup><br/> <b>**"severe"</b>: FEV<sub>1</sub>%<sub>pred</sub> at stage 3 and 4 of GOLD 2005 (<b>NIHNHLBI, 2005</b>) or FEV<sub>1</sub>/Height<sup>2</sup> ≤ 0.4 L/m<sup>2</sup></p> |                                                                                                                                                                                                                                                 |                                                                                                                                                                                                           |                                                                                                                                                                                                                                   |                                                                                                                                                                                                                                                         |                                                                                                                                                                 |                                                                                                                                                                                                                                                                                          |

## References

- Hegendorfer, E., Vaes, B., Andreeva, E., Mathei, C., Van Pottelbergh, G., & Degryse, J. M. (2017). Predictive value of different expressions of forced expiratory volume in 1 second (FEV<sub>1</sub>) for adverse outcomes in a cohort of adults aged 80 and older. *Journal of the American Medical Directors Association, 18*(2), 123-130. doi: 10.1016/j.jamda.2016.08.012
- Huang, T. H., Hsiue, T. R., Lin, S. H., Liao, X. M., Su, P. L., & Chen, C. Z. (2018). Comparison of different staging methods for COPD in predicting outcomes. *The European Respiratory Journal, 51*(3). doi: 10.1183/13993003.00577-2017
- Miller, M. R., & Pedersen, O. F. (2010). New concepts for expressing forced expiratory volume in 1 s arising from survival analysis. *The European Respiratory Journal, 35*(4), 873-882. doi: 10.1183/09031936.00025809
- Miller, M. R., Pedersen, O. F., & Dirksen, A. (2007). A new staging strategy for chronic obstructive pulmonary disease. *International Journal of Chronic Obstructive Pulmonary Disease, 2*(4), 657-663.

- NIHNHLBI. (2005). National Institutes of Health, National Heart, Lung and Blood Institute. 2005. Global strategy for the diagnosis, management, and prevention of chronic obstructive pulmonary disease. NHLBI/WHO workshop report. Update 2005 [online]. Available from <http://www.goldcopd.com>. Last visit: January 17<sup>th</sup> 2020.
- Pedone, C., Scarlata, S., Scichilone, N., Forastiere, F., Bellia, V., & Antonelli-Incalzi, R. (2013). Alternative ways of expressing FEV<sub>1</sub> and mortality in elderly people with and without COPD. *The European Respiratory Journal*, 41(4), 800-805. doi: 10.1183/09031936.00008812
- Turkeshi, E., Vaes, B., Andreeva, E., Mathei, C., Adriaensen, W., Van Pottelbergh, G., & Degryse, J. M. (2015). Short-term prognostic value of forced expiratory volume in 1 second divided by height cubed in a prospective cohort of people 80 years and older. *BMC Geriatrics*, 15(1), 15. doi: 10.1186/s12877-015-0013-4
